# Supplementary material for: Effects of Individual and Combined Water, Sanitation, Handwashing, and Nutritional Interventions on Child Respiratory Infections in Rural Kenya: A Cluster-Randomized Controlled Trial
Source: PubMed Central journal article supplement (PMC7253138; doi:10.4269/ajtmh.19-0779), 2020-03-30

**Supplementary Information for  
WASH Benefits Kenya Respiratory Infections Analysis**

TABLE OF CONTENTS

|                                                                                                                                                                              |    |
|------------------------------------------------------------------------------------------------------------------------------------------------------------------------------|----|
| CONSORT Abstract Checklist.....                                                                                                                                              | 1  |
| CONSORT Checklist .....                                                                                                                                                      | 2  |
| Table S1: Baseline characteristics of participating households and households lost to follow-up .....                                                                        | 5  |
| Table S2: Indicators of intervention adoption one year after intervention delivery .....                                                                                     | 6  |
| Table S3: Indicators of intervention adoption two years after intervention delivery .....                                                                                    | 7  |
| Table S4: Unadjusted effects of interventions on prevalence of respiratory outcomes, interventions vs. control.....                                                          | 8  |
| Table S5: Adjusted effects of interventions on prevalence of respiratory outcomes, interventions vs. control, years one and two combined.....                                | 9  |
| Table S6: Effects of interventions on prevalence of respiratory outcomes, combined (intervention) vs. single (reference) intervention arms, years one and two combined ..... | 10 |
| Table S7: Unadjusted effects of interventions on prevalence of respiratory outcomes, combined (intervention) vs. single (reference) intervention arms, year one only.....    | 11 |
| Table S8: Respiratory outcome prevalence ratios by index child status, interventions vs. control .....                                                                       | 12 |
| Table S9: Respiratory outcome prevalence differences by index child status, interventions vs. control .....                                                                  | 13 |
| Table S10: Respiratory outcome prevalence differences by child sex, interventions vs. control .....                                                                          | 14 |
| Table S11: Respiratory outcome prevalence differences by malaria seasonality, interventions vs. control.....                                                                 | 15 |
| Table S12: Prevalence of breastfeeding indicators .....                                                                                                                      | 16 |
| Table S13: Prevalence of breastfeeding indicators, stratified by child sex.....                                                                                              | 16 |
| Table S14: Unadjusted effects of interventions on prevalence of reported runny nose, intervention vs. control.....                                                           | 17 |
| Table S15: Reported runny nose prevalence ratios and differences by malaria seasonality interventions vs. control                                                            | 17 |
| Figure S1: Acute respiratory illness by calendar month.....                                                                                                                  | 18 |

## CONSORT Abstract Checklist

| Item               | Standard Description                                                                                        | Description for Cluster Trials                                                                                                             | Reported in Line:                                           |
|--------------------|-------------------------------------------------------------------------------------------------------------|--------------------------------------------------------------------------------------------------------------------------------------------|-------------------------------------------------------------|
| Title              | Identification of the study as randomised                                                                   | Identification of the study as cluster-randomised                                                                                          | 2                                                           |
| Trial design       | Description of the trial design (e.g. parallel, cluster, non-inferiority)                                   | Definition of cluster and description of how the design features apply to the clusters                                                     | 31                                                          |
| <b>Methods</b>     |                                                                                                             |                                                                                                                                            |                                                             |
| Participants       | Eligibility criteria for participants and the settings where the data were collected                        | Eligibility criteria for clusters                                                                                                          | 32                                                          |
| Interventions      | Interventions intended for each group                                                                       | Whether interventions pertain to the cluster level, the individual participant level or both                                               | 33-37                                                       |
| Objective          | Specific objective or hypothesis                                                                            |                                                                                                                                            | 30-31                                                       |
| Outcome            | Clearly defined primary outcome for this report                                                             | Whether outcome measures pertain to the cluster level, the individual participant level or both                                            | 38-39                                                       |
| Randomization      | How participants were allocated to interventions                                                            |                                                                                                                                            | 33-34                                                       |
| Blinding (masking) | Whether or not participants, care givers, and those assessing the outcomes were blinded to group assignment |                                                                                                                                            | 39                                                          |
| <b>Results</b>     |                                                                                                             |                                                                                                                                            |                                                             |
| Numbers randomized | Number of participants randomized to each group                                                             | Number of clusters randomized to each group                                                                                                | 40                                                          |
| Recruitment        | Trial status                                                                                                |                                                                                                                                            | Not applicable – publication indicates this is final report |
| Numbers analysed   | Number of participants analysed in each group                                                               | For each group, number of clusters included in each analysis                                                                               | 41                                                          |
| Outcome            | For the primary outcome, a result for each group and the estimated effect size and its precision            | Results at the individual or cluster level as applicable and a coefficient of intracluster correlation (ICC or k) for each primary outcome | 42                                                          |
| Harms              | Important adverse events or side effects                                                                    |                                                                                                                                            | Not applicable                                              |
| Conclusions        | General interpretation of the results                                                                       |                                                                                                                                            | 42-45                                                       |
| Trial registration | Registration number and name of trial register                                                              |                                                                                                                                            | 45                                                          |
| Funding            | Source of funding                                                                                           |                                                                                                                                            | 45                                                          |

## CONSORT Checklist

| Section/Topic                    | Item No | Standard Checklist item                                                                                                                  | Extension for cluster designs                                                                                                                                                                                      | Extension for multi-arm trials                                                                                                                                         | Reported in Section:                         |
|----------------------------------|---------|------------------------------------------------------------------------------------------------------------------------------------------|--------------------------------------------------------------------------------------------------------------------------------------------------------------------------------------------------------------------|------------------------------------------------------------------------------------------------------------------------------------------------------------------------|----------------------------------------------|
| <b>Title and abstract</b>        |         |                                                                                                                                          |                                                                                                                                                                                                                    |                                                                                                                                                                        |                                              |
|                                  | 1a      | Identification as a randomised trial in the title                                                                                        | Identification as a cluster randomised trial in the title                                                                                                                                                          | Identification as a multi-arm randomised trial in the title or an indication of the number of treatment groups that the participants were randomly assigned to         | Title                                        |
|                                  | 1b      | Structured summary of trial design, methods, results, and conclusions (for specific guidance see CONSORT for abstracts) <sup>i, ii</sup> | See table 2                                                                                                                                                                                                        | Specification of the number of treatment groups; details of any groups added or dropped                                                                                | Abstract                                     |
| <b>Introduction</b>              |         |                                                                                                                                          |                                                                                                                                                                                                                    |                                                                                                                                                                        |                                              |
| <b>Background and objectives</b> | 2a      | Scientific background and explanation of rationale                                                                                       | Rationale for using a cluster design                                                                                                                                                                               | Rationale for using a multi-arm design                                                                                                                                 | Introduction                                 |
|                                  | 2b      | Specific objectives or hypotheses                                                                                                        | Whether objectives pertain to the cluster level, the individual participant level or both                                                                                                                          | Specification of the research question referring to all of the treatment groups<br>Clear statement of all hypotheses to be tested and the primary comparisons involved | Introduction, last paragraph                 |
| <b>Methods</b>                   |         |                                                                                                                                          |                                                                                                                                                                                                                    |                                                                                                                                                                        |                                              |
| <b>Trial design</b>              | 3a      | Description of trial design (such as parallel, factorial) including allocation ratio                                                     | Definition of cluster and description of how the design features apply to the clusters                                                                                                                             | Specification of the number of treatment groups                                                                                                                        | Materials and Methods (Study design)         |
|                                  | 3b      | Important changes to methods after trial commencement (such as eligibility criteria), with reasons                                       |                                                                                                                                                                                                                    | Details of any treatment groups added or dropped (if relevant), with reasons, and/or changes to the allocation ratio                                                   | Not applicable                               |
| <b>Participants</b>              | 4a      | Eligibility criteria for participants                                                                                                    | Eligibility criteria for clusters                                                                                                                                                                                  |                                                                                                                                                                        | Materials and Methods (Study design)         |
|                                  | 4b      | Settings and locations where the data were collected                                                                                     |                                                                                                                                                                                                                    |                                                                                                                                                                        | Materials and Methods (Study design)         |
| <b>Interventions</b>             | 5       | The interventions for each group with sufficient details to allow replication, including how and when they were actually administered    | Whether interventions pertain to the cluster level, the individual participant level or both                                                                                                                       |                                                                                                                                                                        | Materials and Methods (Procedures)           |
| <b>Outcomes</b>                  | 6a      | Completely defined pre-specified primary and secondary outcome measures, including how and when they were assessed                       | Whether outcome measures pertain to the cluster level, the individual participant level or both                                                                                                                    |                                                                                                                                                                        | Materials and Methods (Outcomes)             |
|                                  | 6b      | Any changes to trial outcomes after the trial commenced, with reasons                                                                    |                                                                                                                                                                                                                    |                                                                                                                                                                        | Not applicable                               |
| <b>Sample size</b>               | 7a      | How sample size was determined                                                                                                           | Method of calculation, number of clusters(s) (and whether equal or unequal cluster sizes are assumed), cluster size, a coefficient of intracluster correlation (ICC or $k$ ), and an indication of its uncertainty | Planned sample size with details of how it was determined for each primary comparison                                                                                  | Materials and Methods (Statistical analysis) |
|                                  | 7b      | When applicable, explanation of any interim analyses and stopping guidelines                                                             |                                                                                                                                                                                                                    |                                                                                                                                                                        | Not applicable                               |
| <b>Randomisation:</b>            |         |                                                                                                                                          |                                                                                                                                                                                                                    |                                                                                                                                                                        |                                              |
| <b>Sequence generation</b>       | 8a      | Method used to generate the random allocation sequence                                                                                   |                                                                                                                                                                                                                    |                                                                                                                                                                        | Materials and Methods (Study design)         |
|                                  | 8b      | Type of randomisation; details of any restriction (such as blocking and block size)                                                      | Details of stratification or matching if used                                                                                                                                                                      |                                                                                                                                                                        | Materials and Methods (Study design)         |

|                                                             |     |                                                                                                                                                                                             |                                                                                                                                                                                            |                                                                                                                                                                                                                                                 |                                                                |
|-------------------------------------------------------------|-----|---------------------------------------------------------------------------------------------------------------------------------------------------------------------------------------------|--------------------------------------------------------------------------------------------------------------------------------------------------------------------------------------------|-------------------------------------------------------------------------------------------------------------------------------------------------------------------------------------------------------------------------------------------------|----------------------------------------------------------------|
| <b>Allocation concealment mechanism</b>                     | 9   | Mechanism used to implement the random allocation sequence (such as sequentially numbered containers), describing any steps taken to conceal the sequence until interventions were assigned | Specification that allocation was based on clusters rather than individuals and whether allocation concealment (if any) was at the cluster level, the individual participant level or both |                                                                                                                                                                                                                                                 | Materials and Methods (Study design)                           |
| <b>Implementation</b>                                       | 10  | Who generated the random allocation sequence, who enrolled participants, and who assigned participants to interventions                                                                     | Replace by 10a, 10b and 10c                                                                                                                                                                |                                                                                                                                                                                                                                                 |                                                                |
|                                                             | 10a |                                                                                                                                                                                             | Who generated the random allocation sequence, who enrolled clusters, and who assigned clusters to interventions                                                                            |                                                                                                                                                                                                                                                 | Materials and Methods (Study design)                           |
|                                                             | 10b |                                                                                                                                                                                             | Mechanism by which individual participants were included in clusters for the purposes of the trial (such as complete enumeration, random sampling)                                         |                                                                                                                                                                                                                                                 | Materials and Methods (Study design)                           |
|                                                             | 10c |                                                                                                                                                                                             | From whom consent was sought (representatives of the cluster, or individual cluster members, or both), and whether consent was sought before or after randomisation                        |                                                                                                                                                                                                                                                 | Materials and Methods (Study design)                           |
| <b>Blinding</b>                                             | 11a | If done, who was blinded after assignment to interventions (for example, participants, care providers, those assessing outcomes) and how                                                    |                                                                                                                                                                                            |                                                                                                                                                                                                                                                 | Materials and Methods (Study design)                           |
|                                                             | 11b | If relevant, description of the similarity of interventions                                                                                                                                 |                                                                                                                                                                                            |                                                                                                                                                                                                                                                 | Not applicable                                                 |
| <b>Statistical methods</b>                                  | 12a | Statistical methods used to compare groups for primary and secondary outcomes                                                                                                               | How clustering was taken into account                                                                                                                                                      | Explicitly state if no adjustments for multiplicity were applied; if adjustments were applied, state the method used                                                                                                                            | Materials and Methods (Statistical analysis, second paragraph) |
|                                                             | 12b | Methods for additional analyses, such as subgroup analyses and adjusted analyses                                                                                                            |                                                                                                                                                                                            |                                                                                                                                                                                                                                                 | Materials and Methods (Statistical analysis)                   |
| <b>Results</b>                                              |     |                                                                                                                                                                                             |                                                                                                                                                                                            |                                                                                                                                                                                                                                                 |                                                                |
| <b>Participant flow (a diagram is strongly recommended)</b> | 13a | For each group, the numbers of participants who were randomly assigned, received intended treatment, and were analysed for the primary outcome                                              | For each group, the numbers of clusters that were randomly assigned, received intended treatment, and were analysed for the primary outcome                                                |                                                                                                                                                                                                                                                 | Results; Figure 1                                              |
|                                                             | 13b | For each group, losses and exclusions after randomisation, together with reasons                                                                                                            | For each group, losses and exclusions for both clusters and individual cluster members                                                                                                     |                                                                                                                                                                                                                                                 | Results; Figure 1                                              |
| <b>Recruitment</b>                                          | 14a | Dates defining the periods of recruitment and follow-up                                                                                                                                     |                                                                                                                                                                                            | If periods of recruitment and follow-up are different across treatment groups (eg, groups were added or dropped), the periods of recruitment and follow-up, reason(s) for the differences, and any statistical implications should be described | Results, first paragraph                                       |
|                                                             | 14b | Why the trial ended or was stopped                                                                                                                                                          |                                                                                                                                                                                            |                                                                                                                                                                                                                                                 | Not applicable                                                 |
| <b>Baseline data</b>                                        | 15  | A table showing baseline demographic and clinical characteristics for each group                                                                                                            | Baseline characteristics for the individual and cluster levels as applicable for each group                                                                                                |                                                                                                                                                                                                                                                 | Results; Table 1                                               |

|                                |     |                                                                                                                                                   |                                                                                                                                               |                                                              |                                                                                                                          |
|--------------------------------|-----|---------------------------------------------------------------------------------------------------------------------------------------------------|-----------------------------------------------------------------------------------------------------------------------------------------------|--------------------------------------------------------------|--------------------------------------------------------------------------------------------------------------------------|
| <b>Numbers analysed</b>        | 16  | For each group, number of participants (denominator) included in each analysis and whether the analysis was by original assigned groups           | For each group, number of clusters included in each analysis                                                                                  |                                                              | Results; Figure 1                                                                                                        |
| <b>Outcomes and estimation</b> | 17a | For each primary and secondary outcome, results for each group, and the estimated effect size and its precision (such as 95% confidence interval) | Results at the individual or cluster level as applicable and a coefficient of intracluster correlation (ICC or $k$ ) for each primary outcome | Results for each prespecified comparison of treatment groups | Results; Figure 2; Figure 3; Table 2                                                                                     |
|                                | 17b | For binary outcomes, presentation of both absolute and relative effect sizes is recommended                                                       |                                                                                                                                               |                                                              | Results; Figure 2; Figure 3; Table 2; Table S3                                                                           |
| <b>Ancillary analyses</b>      | 18  | Results of any other analyses performed, including subgroup analyses and adjusted analyses, distinguishing pre-specified from exploratory         |                                                                                                                                               |                                                              | Results; Table 3; Table 4; Table S4; Table S5; Table S6; Table S7; Table S11; Table S12; Table S13; Table S14; Table S15 |
| <b>Harms</b>                   | 19  | All important harms or unintended effects in each group (for specific guidance see CONSORT for harms <sup>iii</sup> )                             |                                                                                                                                               |                                                              | Not applicable                                                                                                           |
| <b>Discussion</b>              |     |                                                                                                                                                   |                                                                                                                                               |                                                              |                                                                                                                          |
| <b>Limitations</b>             | 20  | Trial limitations, addressing sources of potential bias, imprecision, and, if relevant, multiplicity of analyses                                  |                                                                                                                                               |                                                              | Discussion, second to last paragraph                                                                                     |
| <b>Generalisability</b>        | 21  | Generalisability (external validity, applicability) of the trial findings                                                                         | Generalisability to clusters and/or individual participants (as relevant)                                                                     |                                                              | Discussion, last paragraph                                                                                               |
| <b>Interpretation</b>          | 22  | Interpretation consistent with results, balancing benefits and harms, and considering other relevant evidence                                     |                                                                                                                                               |                                                              | Discussion                                                                                                               |
| <b>Other information</b>       |     |                                                                                                                                                   |                                                                                                                                               |                                                              |                                                                                                                          |
| <b>Registration</b>            | 23  | Registration number and name of trial registry                                                                                                    |                                                                                                                                               |                                                              | Materials and Methods (Study design)                                                                                     |
| <b>Protocol</b>                | 24  | Where the full trial protocol can be accessed, if available                                                                                       |                                                                                                                                               |                                                              | Reference 21<br>Methods (Study design, first paragraph)                                                                  |
| <b>Funding</b>                 | 25  | Sources of funding and other support (such as supply of drugs), role of funders                                                                   |                                                                                                                                               |                                                              | Financial support                                                                                                        |

<sup>i</sup> Hopewell S, Clarke M, Moher D, Wager E, Middleton P, Altman DG, et al. CONSORT for reporting randomised trials in journal and conference abstracts. *Lancet* 2008, 371:281-283

<sup>ii</sup> Hopewell S, Clarke M, Moher D, Wager E, Middleton P, Altman DG at al (2008) CONSORT for reporting randomized controlled trials in journal and conference abstracts: explanation and elaboration. *PLoS Med* 5(1): e20

<sup>iii</sup> Ioannidis JP, Evans SJ, Gotzsche PC, O'Neill RT, Altman DG, Schulz K, Moher D. Better reporting of harms in randomized trials: an extension of the CONSORT statement. *Ann Intern Med* 2004; 141(10):781-788.

**Table S1: Baseline characteristics of participating households and households lost to follow-up**

| No. of households:                                              | Households in Analysis | Households Lost to Follow-Up |
|-----------------------------------------------------------------|------------------------|------------------------------|
|                                                                 | (N=7057)               | (N=1189)                     |
|                                                                 | n (%) / mean (SD)      | n (%) / mean (SD)            |
| <b>Maternal</b>                                                 |                        |                              |
| Age (years)                                                     | 26 (6)                 | 25 (7)                       |
| Completed primary school                                        | 3345 (47%)             | 568 (48%)                    |
| <b>Paternal</b>                                                 |                        |                              |
| Completed primary school                                        | 4060 (62%)             | 611 (59%)                    |
| Works in agriculture                                            | 2909 (43%)             | 408 (38%)                    |
| <b>Household</b>                                                |                        |                              |
| Number of persons                                               | 5 (2)                  | 5 (3)                        |
| Has electricity                                                 | 499 (7%)               | 63 (5%)                      |
| Has a cement floor                                              | 401 (6%)               | 73 (6%)                      |
| <b>Drinking water</b>                                           |                        |                              |
| Has protected primary drinking water source*                    | 5248 (75%)             | 883 (75%)                    |
| Stored water observed at home                                   | 5760 (82%)             | 919 (78%)                    |
| Reported treating currently stored water                        | 728 (13%)              | 113 (12%)                    |
| <b>Sanitation</b>                                               |                        |                              |
| Daily defecating in the open                                    |                        |                              |
| Children: 3-<8 years                                            | 587 (13%)              | 100 (15%)                    |
| Children: 0-<3 years                                            | 3006 (78%)             | 410 (76%)                    |
| Latrine                                                         |                        |                              |
| Owned by compound                                               | 5831 (83%)             | 951 (80%)                    |
| Household has access to a latrine with slab or ventilation pipe | 1116 (17%)             | 199 (18%)                    |
| Visible stool on slab or floor                                  | 3160 (49%)             | 529 (49%)                    |
| Has a potty                                                     | 157 (2%)               | 33 (3%)                      |
| Human feces observed in the compound                            | 604 (9%)               | 93 (8%)                      |
| <b>Handwashing</b>                                              |                        |                              |
| Handwashing station has water and soap                          | 413 (6%)               | 65 (5%)                      |
| <b>Nutrition</b>                                                |                        |                              |
| Moderate-to-severe household hunger <sup>†</sup>                | 736 (10%)              | 172 (15%)                    |

Percentages were calculated from smaller denominators than those shown at the top of the table for all variables because of missing values.

\* Protected water sources include borewells, protected springs, protected dug wells, rainwater collection, and piped water into the home or yard/plot

<sup>†</sup> Assessed by Household Hunger Scale

**Table S2: Indicators of intervention adoption one year after intervention delivery**

| No. of households:                                              | Control<br>(N=1015) | Water Treatment<br>(N=468) | Sanitation<br>(N=464) | Handwashing<br>(N=483) | Water +<br>Sanitation +<br>Handwashing<br>(N=522) | Nutrition<br>(N=446) | Nutrition +<br>Water +<br>Sanitation +<br>Handwashing<br>(N=485) |
|-----------------------------------------------------------------|---------------------|----------------------------|-----------------------|------------------------|---------------------------------------------------|----------------------|------------------------------------------------------------------|
|                                                                 | n (%)               | n (%)                      | n (%)                 | n (%)                  | n (%)                                             | n (%)                | n (%)                                                            |
| <b>Intervention Promotion</b>                                   |                     |                            |                       |                        |                                                   |                      |                                                                  |
| Visited by a promoter in the past month                         | 655 (69%)           | 334 (76%)                  | 328 (75%)             | 329 (71%)              | 378 (75%)                                         | 341 (80%)            | 384 (82%)                                                        |
| <b>Water Storage</b>                                            |                     |                            |                       |                        |                                                   |                      |                                                                  |
| Had stored drinking water available in household                | 899 (90%)           | 402 (86%)                  | 401 (88%)             | 439 (91%)              | 424 (82%)                                         | 415 (94%)            | 381 (79%)                                                        |
| Obtained stored water from protected water source*              | 671 (80%)           | 283 (76%)                  | 297 (82%)             | 314 (76%)              | 300 (75%)                                         | 313 (81%)            | 276 (78%)                                                        |
| <b>Water Treatment</b>                                          |                     |                            |                       |                        |                                                   |                      |                                                                  |
| Reported treating currently stored water                        | 92 (10%)            | 213 (53%)                  | 48 (12%)              | 49 (11%)               | 251 (59%)                                         | 36 (9%)              | 208 (55%)                                                        |
| Used Vestergaard LifeStraw® family filter                       | 19 (2%)             | 3 (1%)                     | 6 (1%)                | 5 (1%)                 | 1 (0%)                                            | 5 (1%)               | 1 (0%)                                                           |
| Boiled water                                                    | 12 (1%)             | 2 (0%)                     | 4 (1%)                | 4 (1%)                 | 0 (0%)                                            | 3 (1%)               | 1 (0%)                                                           |
| Treated with chlorine                                           | 5 (6%)              | 206 (51%)                  | 29 (7%)               | 35 (8%)                | 250 (59%)                                         | 22 (5%)              | 205 (54%)                                                        |
| Detectable total chlorine in stored drinking water              | 24 (3%)             | 155 (40%)                  | 23 (6%)               | 19 (5%)                | 187 (44%)                                         | 9 (2%)               | 157 (43%)                                                        |
| <b>Sanitation</b>                                               |                     |                            |                       |                        |                                                   |                      |                                                                  |
| Household has access to a latrine with slab or ventilation pipe | 170 (18%)           | 73 (16%)                   | 402 (90%)             | 64 (14%)               | 458 (89%)                                         | 63 (15%)             | 417 (89%)                                                        |
| Has a potty                                                     | 22 (2%)             | 7 (2%)                     | 446 (97%)             | 21 (4%)                | 507 (98%)                                         | 5 (1%)               | 461 (96%)                                                        |
| Child feces safely disposed†                                    | 331 (37%)           | 153 (37%)                  | 313 (77%)             | 153 (36%)              | 320 (70%)                                         | 154 (40%)            | 285 (67%)                                                        |
| <b>Handwashing</b>                                              |                     |                            |                       |                        |                                                   |                      |                                                                  |
| Handwashing station has water and soap                          | 120 (12%)           | 53 (11%)                   | 49 (11%)              | 372 (77%)              | 407 (78%)                                         | 61 (14%)             | 377 (78%)                                                        |
| <b>Nutrition</b>                                                |                     |                            |                       |                        |                                                   |                      |                                                                  |
| LNS sachets consumed (% of expected)                            | -                   | -                          | -                     | -                      | -                                                 | 4984/5264 (95%)      | 5279/5530 (95%)                                                  |

Percentages were calculated from smaller denominators than those shown at the top of the table for all variables because of missing values.

\* Protected water sources include borewells, protected springs, protected dug wells, rainwater collection, and piped water into the home or yard/plot

† Safe child faeces disposal was defined as the index child's last defecation in a latrine, or diaper or potty and rinsed into a latrine or buried

**Table S3: Indicators of intervention adoption two years after intervention delivery**

| No. of households:                                              | Control<br>(N=1506) | Water Treatment<br>(N=691) | Sanitation<br>(N=713) | Handwashing<br>(N=684) | Water +<br>Sanitation +<br>Handwashing<br>(N=676) | Nutrition<br>(N=652) | Nutrition +<br>Water +<br>Sanitation +<br>Handwashing<br>(N=734) |
|-----------------------------------------------------------------|---------------------|----------------------------|-----------------------|------------------------|---------------------------------------------------|----------------------|------------------------------------------------------------------|
|                                                                 | n (%)               | n (%)                      | n (%)                 | n (%)                  | n (%)                                             | n (%)                | n (%)                                                            |
| <b>Intervention Promotion</b>                                   |                     |                            |                       |                        |                                                   |                      |                                                                  |
| Visited by a promoter in the past month                         | 493 (34%)           | 252 (37%)                  | 275 (40%)             | 229 (34%)              | 241 (37%)                                         | 252 (40%)            | 257 (37%)                                                        |
| <b>Water Storage</b>                                            |                     |                            |                       |                        |                                                   |                      |                                                                  |
| Had stored drinking water available in household                | 1406 (94%)          | 631 (92%)                  | 639 (91%)             | 640 (94%)              | 597 (89%)                                         | 613 (95%)            | 647 (89%)                                                        |
| Obtained stored water from protected water source*              | 1196 (85%)          | 498 (79%)                  | 554 (87%)             | 551 (86%)              | 480 (80%)                                         | 497 (81%)            | 525 (81%)                                                        |
| <b>Water Treatment</b>                                          |                     |                            |                       |                        |                                                   |                      |                                                                  |
| Reported treating currently stored water                        | 217 (15%)           | 226 (36%)                  | 93 (15%)              | 81 (13%)               | 196 (33%)                                         | 74 (12%)             | 202 (31%)                                                        |
| Used Vestergaard LifeStraw® family filter                       | 28 (2%)             | 8 (1%)                     | 12 (2%)               | 4 (1%)                 | 0 (0%)                                            | 3 (0%)               | 6 (1%)                                                           |
| Boiled water                                                    | 22 (2%)             | 4 (1%)                     | 8 (1%)                | 11 (2%)                | 8 (1%)                                            | 9 (1%)               | 6 (1%)                                                           |
| Treated with chlorine                                           | 121 (9%)            | 208 (33%)                  | 53 (8%)               | 47 (7%)                | 184 (31%)                                         | 47 (8%)              | 190 (29%)                                                        |
| Detectable total chlorine in stored drinking water              | 48 (3%)             | 150 (24%)                  | 19 (3%)               | 18 (3%)                | 120 (20%)                                         | 17 (3%)              | 127 (20%)                                                        |
| <b>Sanitation</b>                                               |                     |                            |                       |                        |                                                   |                      |                                                                  |
| Household has access to a latrine with slab or ventilation pipe | 287 (20%)           | 126 (19%)                  | 530 (78%)             | 120 (19%)              | 530 (82%)                                         | 98 (16%)             | 558 (80%)                                                        |
| Has a potty                                                     | 76 (5%)             | 30 (4%)                    | 607 (86%)             | 34 (5%)                | 566 (85%)                                         | 31 (5%)              | 609 (84%)                                                        |
| Child feces safely disposed†                                    | 149 (11%)           | 52 (8%)                    | 239 (37%)             | 62 (10%)               | 204 (34%)                                         | 49 (8%)              | 217 (33%)                                                        |
| <b>Handwashing</b>                                              |                     |                            |                       |                        |                                                   |                      |                                                                  |
| Handwashing station has water and soap                          | 131 (9%)            | 51 (7%)                    | 58 (8%)               | 159 (23%)              | 132 (20%)                                         | 76 (12%)             | 154 (21%)                                                        |
| <b>Nutrition</b>                                                |                     |                            |                       |                        |                                                   |                      |                                                                  |
| LNS sachets consumed (% of expected)                            | -                   | -                          | -                     | -                      | -                                                 | 3566/3122 (114%)     | 4046/3486 (116%)                                                 |

Percentages were calculated from smaller denominators than those shown at the top of the table for all variables because of missing values.

\* Protected water sources include borewells, protected springs, protected dug wells, rainwater collection, and piped water into the home or yard/plot

† Safe child faeces disposal was defined as the index child's last defecation in a latrine, or diaper or potty and rinsed into a latrine or buried



**Table S4: Unadjusted effects of interventions on prevalence of respiratory outcomes, interventions vs. control**

| Outcome, Arm                                     | Years One and Two Combined |       |                              |         | Year One Only |       |                              |         |
|--------------------------------------------------|----------------------------|-------|------------------------------|---------|---------------|-------|------------------------------|---------|
|                                                  | N                          | Prev. | Prev. Difference<br>(95% CI) | P-value | N             | Prev. | Prev. Difference<br>(95% CI) | P-value |
| <b>Acute respiratory infection (ARI)*</b>        |                            |       |                              |         |               |       |                              |         |
| Control                                          | 4769                       | 46.0% |                              |         | 2347          | 48.1% |                              |         |
| Water                                            | 1545                       | 48.2% | 0.02 (-0.02 - 0.05)          | 0.397   | 764           | 50.0% | 0.01 (-0.04 - 0.06)          | 0.704   |
| Sanitation                                       | 1546                       | 43.9% | -0.02 (-0.05 - 0.02)         | 0.285   | 755           | 45.6% | -0.02 (-0.06 - 0.02)         | 0.402   |
| Handwashing                                      | 1496                       | 43.8% | -0.02 (-0.05 - 0.02)         | 0.345   | 738           | 47.6% | 0.01 (-0.04 - 0.05)          | 0.769   |
| Nutrition                                        | 1472                       | 42.6% | -0.04 (-0.08 - 0.00)         | 0.050   | 735           | 41.8% | -0.06 (-0.12 - -0.01)        | 0.024   |
| WSH                                              | 1563                       | 44.9% | -0.01 (-0.04 - 0.02)         | 0.470   | 788           | 47.2% | -0.01 (-0.05 - 0.04)         | 0.671   |
| WSHN                                             | 1657                       | 45.1% | -0.01 (-0.05 - 0.02)         | 0.360   | 833           | 46.5% | -0.02 (-0.07 - 0.02)         | 0.275   |
| <b>Panting, wheezing or difficulty breathing</b> |                            |       |                              |         |               |       |                              |         |
| Control                                          | 4765                       | 13.3% |                              |         | 2344          | 11.5% |                              |         |
| Water                                            | 1544                       | 14.0% | 0.00 (-0.02 - 0.03)          | 0.788   | 764           | 12.8% | 0.01 (-0.02 - 0.05)          | 0.526   |
| Sanitation                                       | 1545                       | 11.0% | -0.02 (-0.04 - 0.00)         | 0.074   | 754           | 10.5% | -0.01 (-0.04 - 0.02)         | 0.591   |
| Handwashing                                      | 1496                       | 13.0% | 0.00 (-0.02 - 0.02)          | 0.785   | 738           | 13.1% | 0.01 (-0.02 - 0.05)          | 0.389   |
| Nutrition                                        | 1470                       | 12.1% | -0.01 (-0.04 - 0.01)         | 0.400   | 734           | 10.4% | -0.01 (-0.04 - 0.02)         | 0.598   |
| WSH                                              | 1563                       | 13.2% | 0.00 (-0.02 - 0.02)          | 0.976   | 788           | 13.5% | 0.02 (-0.02 - 0.06)          | 0.378   |
| WSHN                                             | 1657                       | 12.7% | -0.01 (-0.03 - 0.02)         | 0.541   | 833           | 10.3% | -0.01 (-0.04 - 0.02)         | 0.462   |
| <b>Fever and ARI</b>                             |                            |       |                              |         |               |       |                              |         |
| Control                                          | 4764                       | 24.7% |                              |         | 2345          | 26.1% |                              |         |
| Water                                            | 1544                       | 27.0% | 0.02 (-0.01 - 0.05)          | 0.134   | 763           | 27.3% | 0.01 (-0.03 - 0.05)          | 0.625   |
| Sanitation                                       | 1546                       | 24.3% | 0.00 (-0.03 - 0.02)          | 0.716   | 755           | 24.9% | -0.02 (-0.05 - 0.02)         | 0.416   |
| Handwashing                                      | 1496                       | 23.7% | -0.01 (-0.04 - 0.02)         | 0.505   | 738           | 25.9% | 0.00 (-0.04 - 0.03)          | 0.937   |
| Nutrition                                        | 1470                       | 22.2% | -0.03 (-0.06 - 0.00)         | 0.043   | 734           | 21.8% | -0.05 (-0.09 - 0.00)         | 0.033   |
| WSH                                              | 1563                       | 24.4% | -0.01 (-0.03 - 0.02)         | 0.675   | 788           | 25.5% | -0.01 (-0.04 - 0.02)         | 0.589   |
| WSHN                                             | 1656                       | 25.1% | 0.00 (-0.03 - 0.02)          | 0.776   | 832           | 25.0% | -0.02 (-0.05 - 0.02)         | 0.365   |
| <b>Visibly runny nose</b>                        |                            |       |                              |         |               |       |                              |         |
| Control                                          | 4422                       | 6.7%  |                              |         | 2035          | 6.9%  |                              |         |
| Water                                            | 1407                       | 6.7%  | 0.00 (-0.01 - 0.02)          | 0.749   | 647           | 7.3%  | 0.01 (-0.02 - 0.04)          | 0.576   |
| Sanitation                                       | 1416                       | 6.2%  | 0.00 (-0.02 - 0.02)          | 0.952   | 632           | 4.3%  | -0.03 (-0.05 - 0.00)         | 0.050   |
| Handwashing                                      | 1397                       | 6.7%  | 0.00 (-0.02 - 0.01)          | 0.535   | 650           | 7.8%  | 0.01 (-0.02 - 0.04)          | 0.654   |
| Nutrition                                        | 1346                       | 7.0%  | 0.01 (-0.01 - 0.02)          | 0.522   | 618           | 7.6%  | 0.01 (-0.02 - 0.04)          | 0.468   |
| WSH                                              | 1421                       | 6.5%  | 0.00 (-0.01 - 0.02)          | 0.698   | 662           | 6.8%  | 0.00 (-0.03 - 0.03)          | 0.889   |
| WSHN                                             | 1500                       | 5.9%  | -0.01 (-0.03 - 0.01)         | 0.418   | 687           | 4.8%  | -0.02 (-0.05 - 0.00)         | 0.052   |

\*An ARI was defined as caregiver-reported cough or difficulty breathing, including panting and wheezing, within the past seven days prior to the interview

**Table S5: Adjusted effects of interventions on prevalence of respiratory outcomes, interventions vs. control, years one and two combined**

| <b>Outcome, Arm</b>                              | <b>N</b> | <b>Prev.</b> | <b>Prev. Ratio<br/>(95% CI)</b> | <b>P-value</b> | <b>Prev. Difference<br/>(95% CI)</b> | <b>P-value</b> |
|--------------------------------------------------|----------|--------------|---------------------------------|----------------|--------------------------------------|----------------|
| <b>Acute respiratory infection (ARI)*</b>        |          |              |                                 |                |                                      |                |
| Control                                          | 4769     | 46.0%        |                                 |                |                                      |                |
| Water                                            | 1545     | 48.2%        | 1.01 (0.94 - 1.09)              | 0.736          | 0.01 (-0.03 - 0.04)                  | 0.727          |
| Sanitation                                       | 1546     | 43.9%        | 0.97 (0.90 - 1.05)              | 0.512          | -0.01 (-0.05 - 0.02)                 | 0.514          |
| Handwashing                                      | 1496     | 43.8%        | 0.95 (0.89 - 1.03)              | 0.210          | -0.02 (-0.05 - 0.01)                 | 0.233          |
| Nutrition                                        | 1472     | 42.6%        | 0.92 (0.85 - 1.00)              | 0.060          | -0.03 (-0.07 - 0.00)                 | 0.058          |
| WSH                                              | 1563     | 44.9%        | 0.96 (0.90 - 1.03)              | 0.216          | -0.02 (-0.05 - 0.01)                 | 0.209          |
| WSHN                                             | 1657     | 45.1%        | 1.00 (0.93 - 1.07)              | 0.911          | 0.00 (-0.03 - 0.03)                  | 0.890          |
| <b>Panting, wheezing or difficulty breathing</b> |          |              |                                 |                |                                      |                |
| Control                                          | 4765     | 13.3%        |                                 |                |                                      |                |
| Water                                            | 1544     | 14.0%        | 0.99 (0.84 - 1.17)              | 0.928          | 0.00 (-0.03 - 0.02)                  | 0.847          |
| Sanitation                                       | 1545     | 11.0%        | 0.93 (0.79 - 1.09)              | 0.371          | -0.01 (-0.03 - 0.01)                 | 0.294          |
| Handwashing                                      | 1496     | 13.0%        | 0.97 (0.86 - 1.10)              | 0.680          | 0.00 (-0.02 - 0.01)                  | 0.726          |
| Nutrition                                        | 1470     | 12.1%        | 0.93 (0.79 - 1.10)              | 0.403          | -0.01 (-0.03 - 0.01)                 | 0.313          |
| WSH                                              | 1563     | 13.2%        | 0.96 (0.82 - 1.11)              | 0.563          | 0.00 (-0.02 - 0.01)                  | 0.603          |
| WSHN                                             | 1657     | 12.7%        | 1.02 (0.87 - 1.20)              | 0.800          | 0.00 (-0.02 - 0.02)                  | 0.878          |
| <b>Fever and ARI</b>                             |          |              |                                 |                |                                      |                |
| Control                                          | 4764     | 24.7%        |                                 |                |                                      |                |
| Water                                            | 1544     | 27.0%        | 1.06 (0.95 - 1.18)              | 0.328          | 0.01 (-0.02 - 0.04)                  | 0.329          |
| Sanitation                                       | 1546     | 24.3%        | 1.00 (0.89 - 1.12)              | 0.997          | 0.00 (-0.03 - 0.03)                  | 0.914          |
| Handwashing                                      | 1496     | 23.7%        | 0.94 (0.82 - 1.06)              | 0.285          | -0.02 (-0.04 - 0.01)                 | 0.277          |
| Nutrition                                        | 1470     | 22.2%        | 0.88 (0.77 - 1.00)              | 0.048          | -0.03 (-0.06 - 0.00)                 | 0.052          |
| WSH                                              | 1563     | 24.4%        | 0.98 (0.89 - 1.08)              | 0.676          | 0.00 (-0.03 - 0.02)                  | 0.759          |
| WSHN                                             | 1656     | 25.1%        | 1.01 (0.92 - 1.11)              | 0.844          | 0.00 (-0.02 - 0.03)                  | 0.820          |
| <b>Visibly runny nose</b>                        |          |              |                                 |                |                                      |                |
| Control                                          | 4422     | 6.7%         |                                 |                |                                      |                |
| Water                                            | 1407     | 6.7%         | 0.96 (0.72 - 1.28)              | 0.770          | 0.00 (-0.02 - 0.02)                  | 0.949          |
| Sanitation                                       | 1416     | 6.2%         | 0.96 (0.72 - 1.29)              | 0.783          | 0.00 (-0.02 - 0.02)                  | 0.965          |
| Handwashing                                      | 1397     | 6.7%         | 0.83 (0.64 - 1.09)              | 0.176          | -0.01 (-0.03 - 0.01)                 | 0.170          |
| Nutrition                                        | 1346     | 7.0%         | 1.07 (0.82 - 1.41)              | 0.609          | 0.01 (-0.01 - 0.02)                  | 0.577          |
| WSH                                              | 1421     | 6.5%         | 1.19 (0.91 - 1.56)              | 0.211          | 0.01 (-0.01 - 0.03)                  | 0.338          |
| WSHN                                             | 1500     | 5.9%         | 0.90 (0.64 - 1.27)              | 0.551          | -0.0 (-0.03 - 0.01)                  | 0.570          |

\*An ARI was defined as caregiver-reported cough or difficulty breathing, including panting and wheezing, within the past seven days prior to the interview

**Table S6: Effects of interventions on prevalence of respiratory outcomes, combined (intervention) vs. single (reference) intervention arms, years one and two combined**

| Outcome, Arm                                     | Unadjusted              |             |                              |             | Adjusted                |             |                              |             |
|--------------------------------------------------|-------------------------|-------------|------------------------------|-------------|-------------------------|-------------|------------------------------|-------------|
|                                                  | Prev. Ratio<br>(95% CI) | P-<br>value | Prev. Difference<br>(95% CI) | P-<br>value | Prev. Ratio<br>(95% CI) | P-<br>value | Prev. Difference<br>(95% CI) | P-<br>value |
| <b>Acute respiratory infection (ARI)*</b>        |                         |             |                              |             |                         |             |                              |             |
| WSH vs. Water                                    | 0.94 (0.86 - 1.03)      | 0.217       | -0.03 (-0.07 - 0.02)         | 0.218       | 0.94 (0.86 - 1.03)      | 0.185       | -0.03 (-0.07 - 0.01)         | 0.164       |
| WSH vs. Sanitation                               | 1.04 (0.94 - 1.15)      | 0.461       | 0.02 (-0.03 - 0.06)          | 0.461       | 1.01 (0.92 - 1.11)      | 0.823       | 0.00 (-0.04 - 0.04)          | 0.880       |
| WSH vs. Handwashing                              | 1.03 (0.94 - 1.13)      | 0.496       | 0.01 (-0.03 - 0.05)          | 0.495       | 1.04 (0.95 - 1.14)      | 0.369       | 0.02 (-0.02 - 0.06)          | 0.384       |
| WSHN vs. WSH                                     | 1.01 (0.92 - 1.11)      | 0.834       | 0.00 (-0.04 - 0.05)          | 0.834       | 1.08 (0.99 - 1.18)      | 0.090       | 0.03 (-0.01 - 0.07)          | 0.115       |
| WSHN vs. Nutrition                               | 1.07 (0.98 - 1.16)      | 0.133       | 0.03 (-0.01 - 0.07)          | 0.130       | 1.10 (1.02 - 1.19)      | 0.015       | 0.04 (0.01 - 0.08)           | 0.021       |
| <b>Panting, wheezing or difficulty breathing</b> |                         |             |                              |             |                         |             |                              |             |
| WSH vs. Water                                    | 0.98 (0.79 - 1.20)      | 0.827       | 0.00 (-0.03 - 0.02)          | 0.828       | 0.95 (0.76 - 1.17)      | 0.620       | -0.01 (-0.04 - 0.02)         | 0.567       |
| WSH vs. Sanitation                               | 1.24 (1.00 - 1.55)      | 0.054       | 0.03 (0.00 - 0.05)           | 0.052       | 1.24 (0.99 - 1.55)      | 0.061       | 0.02 (0.00 - 0.04)           | 0.108       |
| WSH vs. Handwashing                              | 1.07 (0.85 - 1.35)      | 0.557       | 0.01 (-0.02 - 0.04)          | 0.557       | 1.04 (0.84 - 1.29)      | 0.724       | 0.00 (-0.02 - 0.03)          | 0.721       |
| WSHN vs. WSH                                     | 0.97 (0.78 - 1.20)      | 0.773       | 0.00 (-0.03 - 0.02)          | 0.772       | 1.02 (0.82 - 1.27)      | 0.843       | 0.01 (-0.02 - 0.03)          | 0.608       |
| WSHN vs. Nutrition                               | 0.97 (0.77 - 1.22)      | 0.796       | 0.00 (-0.03 - 0.03)          | 0.796       | 1.10 (0.90 - 1.33)      | 0.360       | 0.01 (-0.02 - 0.03)          | 0.618       |
| <b>Fever and ARI</b>                             |                         |             |                              |             |                         |             |                              |             |
| WSH vs. Water                                    | 0.93 (0.81 - 1.06)      | 0.280       | -0.02 (-0.05 - 0.02)         | 0.283       | 0.94 (0.83 - 1.07)      | 0.336       | -0.02 (-0.05 - 0.02)         | 0.302       |
| WSH vs. Sanitation                               | 1.04 (0.90 - 1.21)      | 0.585       | 0.01 (-0.03 - 0.05)          | 0.585       | 0.99 (0.87 - 1.13)      | 0.905       | 0.00 (-0.03 - 0.03)          | 0.996       |
| WSH vs. Handwashing                              | 1.07 (0.92 - 1.25)      | 0.351       | 0.02 (-0.02 - 0.05)          | 0.348       | 1.12 (0.97 - 1.30)      | 0.134       | 0.02 (-0.01 - 0.06)          | 0.186       |
| WSHN vs. WSH                                     | 1.01 (0.88 - 1.16)      | 0.841       | 0.00 (-0.03 - 0.04)          | 0.841       | 1.06 (0.93 - 1.20)      | 0.400       | 0.01 (-0.02 - 0.04)          | 0.404       |
| WSHN vs. Nutrition                               | 1.15 (1.00 - 1.33)      | 0.046       | 0.03 (0.00 - 0.07)           | 0.044       | 1.20 (1.04 - 1.39)      | 0.012       | 0.04 (0.01 - 0.08)           | 0.014       |
| <b>Visibly runny nose</b>                        |                         |             |                              |             |                         |             |                              |             |
| WSH vs. Water                                    | 0.98 (0.70 - 1.36)      | 0.901       | 0.00 (-0.02 - 0.02)          | 0.901       | 1.19 (0.85 - 1.66)      | 0.324       | 0.01 (-0.01 - 0.04)          | 0.334       |
| WSH vs. Sanitation                               | 1.20 (0.84 - 1.71)      | 0.318       | 0.01 (-0.01 - 0.03)          | 0.314       | 1.40 (0.93 - 2.13)      | 0.110       | 0.01 (-0.01 - 0.04)          | 0.200       |
| WSH vs. Handwashing                              | 1.11 (0.81 - 1.53)      | 0.504       | 0.01 (-0.01 - 0.03)          | 0.502       | 1.36 (0.97 - 1.90)      | 0.073       | 0.02 (0.00 - 0.04)           | 0.119       |
| WSHN vs. WSH                                     | 0.80 (0.54 - 1.20)      | 0.282       | -0.01 (-0.04 - 0.01)         | 0.269       | 0.83 (0.55 - 1.24)      | 0.361       | -0.02 (-0.04 - 0.01)         | 0.235       |
| WSHN vs. Nutrition                               | 0.82 (0.56 - 1.19)      | 0.291       | -0.01 (-0.04 - 0.01)         | 0.275       | 0.78 (0.49 - 1.25)      | 0.305       | -0.01 (-0.04 - 0.01)         | 0.302       |

\*An ARI was defined as caregiver-reported cough or difficulty breathing, including panting and wheezing, within the past seven days prior to the interview

**Table S7: Unadjusted effects of interventions on prevalence of respiratory outcomes, combined (intervention) vs. single (reference) intervention arms, year one only**

| <b>Outcome, Arm</b>                              | <b>Prev. Ratio<br/>(95% CI)</b> | <b>P-value</b> | <b>Prev. Difference<br/>(95% CI)</b> | <b>P-value</b> |
|--------------------------------------------------|---------------------------------|----------------|--------------------------------------|----------------|
| <b>Acute respiratory infection (ARI)*</b>        |                                 |                |                                      |                |
| WSH vs. Water                                    | 0.98 (0.87 - 1.11)              | 0.751          | -0.01 (-0.07 - 0.05)                 | 0.751          |
| WSH vs. Sanitation                               | 1.07 (0.94 - 1.21)              | 0.317          | 0.03 (-0.03 - 0.09)                  | 0.318          |
| WSH vs. Handwashing                              | 1.00 (0.88 - 1.13)              | 0.943          | 0.00 (-0.06 - 0.06)                  | 0.943          |
| WSHN vs. WSH                                     | 0.98 (0.86 - 1.12)              | 0.788          | -0.01 (-0.07 - 0.05)                 | 0.788          |
| WSHN vs. Nutrition                               | 1.13 (0.99 - 1.28)              | 0.061          | 0.05 (0.00 - 0.11)                   | 0.058          |
| <b>Panting, wheezing or difficulty breathing</b> |                                 |                |                                      |                |
| WSH vs. Water                                    | 1.08 (0.75 - 1.55)              | 0.685          | 0.01 (-0.04 - 0.06)                  | 0.685          |
| WSH vs. Sanitation                               | 1.33 (0.92 - 1.93)              | 0.124          | 0.03 (-0.01 - 0.08)                  | 0.119          |
| WSH vs. Handwashing                              | 1.09 (0.78 - 1.53)              | 0.622          | 0.01 (-0.03 - 0.06)                  | 0.625          |
| WSHN vs. WSH                                     | 0.77 (0.56 - 1.05)              | 0.100          | -0.03 (-0.07 - 0.01)                 | 0.106          |
| WSHN vs. Nutrition                               | 0.87 (0.62 - 1.22)              | 0.426          | -0.01 (-0.05 - 0.02)                 | 0.424          |
| <b>Fever and ARI</b>                             |                                 |                |                                      |                |
| WSH vs. Water                                    | 0.96 (0.80 - 1.16)              | 0.702          | -0.01 (-0.06 - 0.04)                 | 0.702          |
| WSH vs. Sanitation                               | 1.11 (0.81 - 1.35)              | 0.325          | 0.02 (-0.02 - 0.07)                  | 0.323          |
| WSH vs. Handwashing                              | 1.01 (0.84 - 1.20)              | 0.956          | 0.00 (-0.04 - 0.05)                  | 0.956          |
| WSHN vs. WSH                                     | 0.96 (0.80 - 1.16)              | 0.683          | -0.01 (-0.06 - 0.04)                 | 0.683          |
| WSHN vs. Nutrition                               | 1.17 (0.94 - 1.46)              | 0.166          | 0.04 (-0.01 - 0.09)                  | 0.163          |
| <b>Visibly runny nose</b>                        |                                 |                |                                      |                |
| WSH vs. Water                                    | 0.98 (0.62 - 1.57)              | 0.944          | 0.00 (-0.04 - 0.03)                  | 0.944          |
| WSH vs. Sanitation                               | 1.77 (0.97 - 3.22)              | 0.064          | 0.03 (0.00 - 0.06)                   | 0.06           |
| WSH vs. Handwashing                              | 0.94 (0.58 - 1.52)              | 0.803          | 0.00 (-0.04 - 0.03)                  | 0.803          |
| WSHN vs. WSH                                     | 0.62 (0.38 - 1.02)              | 0.060          | -0.03 (-0.06 - 0.00)                 | 0.071          |
| WSHN vs. Nutrition                               | 0.59 (0.36 - 0.96)              | 0.033          | -0.03 (-0.06 - 0.00)                 | 0.042          |

\*An ARI was defined as caregiver-reported cough or difficulty breathing, including panting and wheezing, within the past seven days prior to the interview

**Table S8: Respiratory outcome prevalence ratios by index child status, interventions vs. control**

| Subgroup                                         | Index Children |       |                         | Non-index Children |       |                         | Interaction<br>P-value |
|--------------------------------------------------|----------------|-------|-------------------------|--------------------|-------|-------------------------|------------------------|
|                                                  | N              | Prev. | Prev. Ratio<br>(95% CI) | N                  | Prev. | Prev. Ratio<br>(95% CI) |                        |
| <b>Acute respiratory infection (ARI)*</b>        |                |       |                         |                    |       |                         |                        |
| Control                                          | 4331           | 46.5% |                         | 438                | 41.1% |                         |                        |
| Water                                            | 1395           | 48.7% | 1.03 (0.96 - 1.11)      | 150                | 44.0% | 1.04 (0.81 - 1.33)      | 0.965                  |
| Sanitation                                       | 1383           | 44.9% | 0.97 (0.90 - 1.05)      | 163                | 35.6% | 0.84 (0.66 - 1.07)      | 0.212                  |
| Handwashing                                      | 1357           | 44.6% | 0.97 (0.90 - 1.05)      | 139                | 36.0% | 0.87 (0.67 - 1.14)      | 0.408                  |
| Nutrition                                        | 1329           | 43.1% | 0.92 (0.84 - 1.01)      | 143                | 37.8% | 0.87 (0.66 - 1.14)      | 0.689                  |
| WSH                                              | 1415           | 45.3% | 0.97 (0.90 - 1.05)      | 148                | 41.2% | 0.96 (0.77 - 1.19)      | 0.875                  |
| WSHN                                             | 1473           | 45.8% | 0.97 (0.91 - 1.05)      | 184                | 39.7% | 0.94 (0.76 - 1.15)      | 0.709                  |
| <b>Panting, wheezing or difficulty breathing</b> |                |       |                         |                    |       |                         |                        |
| Control                                          | 4327           | 13.6% |                         | 438                | 10.5% |                         |                        |
| Water                                            | 1394           | 14.8% | 1.07 (0.90 - 1.28)      | 150                | 6.0%  | 0.47 (0.23 - 0.97)      | 0.031                  |
| Sanitation                                       | 1382           | 10.9% | 0.83 (0.69 - 1.00)      | 163                | 11.7% | 1.12 (0.64 - 1.95)      | 0.292                  |
| Handwashing                                      | 1357           | 13.3% | 0.98 (0.84 - 1.14)      | 139                | 10.1% | 0.99 (0.54 - 1.83)      | 0.952                  |
| Nutrition                                        | 1327           | 12.4% | 0.92 (0.75 - 1.13)      | 143                | 9.8%  | 0.90 (0.50 - 1.60)      | 0.930                  |
| WSH                                              | 1415           | 13.6% | 1.02 (0.85 - 1.23)      | 148                | 9.5%  | 0.77 (0.45 - 1.31)      | 0.327                  |
| WSHN                                             | 1473           | 12.6% | 0.92 (0.76 - 1.11)      | 184                | 13.6% | 1.22 (0.81 - 1.85)      | 0.155                  |
| <b>Fever and ARI</b>                             |                |       |                         |                    |       |                         |                        |
| Control                                          | 4326           | 25.6% |                         | 438                | 16.4% |                         |                        |
| Water                                            | 1394           | 27.8% | 1.07 (0.96 - 1.20)      | 150                | 20.0% | 1.26 (0.81 - 1.96)      | 0.511                  |
| Sanitation                                       | 1383           | 25.2% | 0.99 (0.89 - 1.11)      | 163                | 16.0% | 0.91 (0.56 - 1.48)      | 0.723                  |
| Handwashing                                      | 1357           | 24.6% | 0.97 (0.86 - 1.09)      | 139                | 14.4% | 0.87 (0.52 - 1.45)      | 0.682                  |
| Nutrition                                        | 1327           | 23.1% | 0.89 (0.78 - 1.01)      | 143                | 14.0% | 0.76 (0.45 - 1.28)      | 0.551                  |
| WSH                                              | 1415           | 25.1% | 0.97 (0.88 - 1.08)      | 148                | 17.6% | 1.05 (0.66 - 1.66)      | 0.761                  |
| WSHN                                             | 1472           | 25.7% | 0.98 (0.88 - 1.09)      | 184                | 20.1% | 1.17 (0.79 - 1.73)      | 0.397                  |
| <b>Visibly runny nose</b>                        |                |       |                         |                    |       |                         |                        |
| Control                                          | 4300           | 6.8%  |                         | 122                | 4.1%  |                         |                        |
| Water                                            | 1375           | 6.8%  | 1.05 (0.81 - 1.36)      | 32                 | 0.0%  | NA                      | NA                     |
| Sanitation                                       | 1378           | 6.4%  | 1.01 (0.77 - 1.32)      | 38                 | 0.0%  | NA                      | NA                     |
| Handwashing                                      | 1358           | 6.8%  | 0.93 (0.74 - 1.18)      | 39                 | 2.6%  | 0.68 (0.07 - 6.23)      | 0.780                  |
| Nutrition                                        | 1315           | 7.1%  | 1.09 (0.85 - 1.40)      | 31                 | 0.0%  | NA                      | NA                     |
| WSH                                              | 1387           | 6.6%  | 1.04 (0.79 - 1.35)      | 34                 | 5.9%  | 2.73 (0.46 - 16.3)      | 0.300                  |
| WSHN                                             | 1452           | 6.1%  | 0.90 (0.66 - 1.22)      | 48                 | 0.0%  | NA                      | NA                     |

\*An ARI was defined as caregiver-reported cough or difficulty breathing, including panting and wheezing, within the past seven days prior to the interview

**Table S9: Respiratory outcome prevalence differences by index child status, interventions vs. control**

| Subgroup                                         | Index Children |       |                           | Non-index Children |       |                           | Interaction P-value |
|--------------------------------------------------|----------------|-------|---------------------------|--------------------|-------|---------------------------|---------------------|
|                                                  | N              | Prev. | Prev. Difference (95% CI) | N                  | Prev. | Prev. Difference (95% CI) |                     |
| <b>Acute respiratory infection (ARI)*</b>        |                |       |                           |                    |       |                           |                     |
| Control                                          | 4331           | 46.5% |                           | 438                | 41.1% |                           |                     |
| Water                                            | 1395           | 48.7% | 0.02 (-0.02 - 0.05)       | 150                | 44.0% | 0.01 (-0.09 - 0.12)       | 0.991               |
| Sanitation                                       | 1383           | 44.9% | -0.01 (-0.5 - 0.02)       | 163                | 35.6% | -0.07 (-0.16 - 0.02)      | 0.203               |
| Handwashing                                      | 1357           | 44.6% | -0.01 (-0.05 - 0.02)      | 139                | 36.0% | -0.05 (-0.15 - 0.05)      | 0.417               |
| Nutrition                                        | 1329           | 43.1% | -0.04 (-0.08 - 0.00)      | 143                | 37.8% | -0.06 (-0.16 - 0.05)      | 0.733               |
| WSH                                              | 1415           | 45.3% | -0.01 (-0.05 - 0.02)      | 148                | 41.2% | -0.02 (-0.11 - 0.07)      | 0.897               |
| WSHN                                             | 1473           | 45.8% | -0.01 (-0.05 - 0.02)      | 184                | 39.7% | -0.03 (-0.11 - 0.05)      | 0.706               |
| <b>Panting, wheezing or difficulty breathing</b> |                |       |                           |                    |       |                           |                     |
| Control                                          | 4327           | 13.6% |                           | 438                | 10.5% |                           |                     |
| Water                                            | 1394           | 14.8% | 0.01 (-0.02 - 0.04)       | 150                | 6.0%  | -0.06 (-0.11 - -0.01)     | 0.009               |
| Sanitation                                       | 1382           | 10.9% | -0.02 (-0.04 - 0.00)      | 163                | 11.7% | 0.01 (-0.05 - 0.08)       | 0.276               |
| Handwashing                                      | 1357           | 13.3% | 0.00 (-0.02 - 0.02)       | 139                | 10.1% | 0.00 (-0.06 - 0.06)       | 0.909               |
| Nutrition                                        | 1327           | 12.4% | -0.01 (-0.04 - 0.02)      | 143                | 9.8%  | -0.01 (-0.07 - 0.05)      | 0.980               |
| WSH                                              | 1415           | 13.6% | 0.00 (-0.02 - 0.03)       | 148                | 9.5%  | -0.02 (-0.07 - 0.02)      | 0.328               |
| WSHN                                             | 1473           | 12.6% | -0.01 (-0.03 - 0.01)      | 184                | 13.6% | 0.02 (-0.03 - 0.08)       | 0.163               |
| <b>Fever and ARI</b>                             |                |       |                           |                    |       |                           |                     |
| Control                                          | 4326           | 25.6% |                           | 438                | 16.4% |                           |                     |
| Water                                            | 1394           | 27.8% | 0.02 (-0.01 - 0.05)       | 150                | 20.0% | 0.04 (-0.04 - 0.12)       | 0.276               |
| Sanitation                                       | 1383           | 25.2% | 0.0 (-0.03 - 0.03)        | 163                | 16.0% | -0.02 (-0.09 - 0.06)      | 0.639               |
| Handwashing                                      | 1357           | 24.6% | -0.01 (-0.04 - 0.02)      | 139                | 14.4% | -0.02 (-0.09 - 0.05)      | 0.756               |
| Nutrition                                        | 1327           | 23.1% | -0.03 (-0.06 - 0.00)      | 143                | 14.0% | -0.05 (-0.12 - 0.03)      | 0.702               |
| WSH                                              | 1415           | 25.1% | -0.01 (-0.03 - 0.02)      | 148                | 17.6% | 0.01 (-0.07 - 0.08)       | 0.759               |
| WSHN                                             | 1472           | 25.7% | -0.01 (-0.03 - 0.02)      | 184                | 20.1% | 0.03 (-0.05 - 0.10)       | 0.421               |
| <b>Visibly runny nose</b>                        |                |       |                           |                    |       |                           |                     |
| Control                                          | 4300           | 6.8%  |                           | 122                | 4.1%  |                           |                     |
| Water                                            | 1375           | 6.8%  | 0.0 (-0.01 - 0.02)        | 32                 | 0.0%  | NA                        | NA                  |
| Sanitation                                       | 1378           | 6.4%  | 0.00 (-0.02 - 0.02)       | 38                 | 0.0%  | NA                        | NA                  |
| Handwashing                                      | 1358           | 6.8%  | 0.00 (-0.02 - 0.01)       | 39                 | 2.6%  | -0.01 (-0.07 - 0.06)      | 0.897               |
| Nutrition                                        | 1315           | 7.1%  | 0.01 (-0.01 - 0.02)       | 31                 | 0.0%  | NA                        | NA                  |
| WSH                                              | 1387           | 6.6%  | 0.00 (-0.02 - 0.02)       | 34                 | 5.9%  | 0.05 (-0.05 - 0.14)       | 0.378               |
| WSHN                                             | 1452           | 6.1%  | -0.01 (-0.03 - 0.01)      | 48                 | 0.0%  | NA                        | NA                  |

\*An ARI was defined as caregiver-reported cough or difficulty breathing, including panting and wheezing, within the past seven days prior to the interview

**Table S10: Respiratory outcome prevalence differences by child sex, interventions vs. control**

| Subgroup                                         | Male |       |                           | Female |       |                           | Interaction P-value |
|--------------------------------------------------|------|-------|---------------------------|--------|-------|---------------------------|---------------------|
|                                                  | N    | Prev. | Prev. Difference (95% CI) | N      | Prev. | Prev. Difference (95% CI) |                     |
| <b>Acute respiratory infection (ARI)*</b>        |      |       |                           |        |       |                           |                     |
| Control                                          | 2254 | 44.8% |                           | 2487   | 47.4% |                           |                     |
| Water                                            | 724  | 51.0% | 0.05 (0.00 - 0.10)        | 812    | 46.1% | -0.02 (-0.06 - 0.03)      | 0.033               |
| Sanitation                                       | 751  | 42.7% | -0.02 (-0.07 - 0.03)      | 783    | 45.5% | -0.02 (-0.07 - 0.03)      | 0.907               |
| Handwashing                                      | 736  | 45.2% | 0.00 (-0.04 - 0.05)       | 755    | 42.4% | -0.04 (-0.08 - 0.01)      | 0.180               |
| Nutrition                                        | 760  | 43.4% | -0.03 (-0.08 - 0.02)      | 705    | 42.1% | -0.05 (-0.10 - 0.01)      | 0.641               |
| WSH                                              | 742  | 46.1% | 0.01 (-0.03 - 0.06)       | 812    | 44.3% | -0.04 (-0.07 - 0.00)      | 0.078               |
| WSHN                                             | 799  | 43.2% | -0.03 (-0.08 - 0.02)      | 847    | 47.3% | 0.00 (-0.04 - 0.04)       | 0.318               |
| <b>Panting, wheezing or difficulty breathing</b> |      |       |                           |        |       |                           |                     |
| Control                                          | 2252 | 13.8% |                           | 2485   | 13.0% |                           |                     |
| Water                                            | 724  | 15.5% | 0.01 (-0.03 - 0.04)       | 811    | 12.8% | 0.00 (-0.03 - 0.03)       | 0.800               |
| Sanitation                                       | 750  | 10.7% | -0.03 (-0.06 - 0.00)      | 783    | 11.5% | -0.01 (-0.04 - 0.01)      | 0.329               |
| Handwashing                                      | 736  | 13.0% | -0.01 (-0.04 - 0.03)      | 755    | 13.0% | 0.00 (-0.03 - 0.02)       | 0.850               |
| Nutrition                                        | 760  | 10.4% | -0.04 (-0.07 - -0.01)     | 703    | 14.1% | 0.02 (-0.02 - 0.06)       | 0.022               |
| WSH                                              | 742  | 14.4% | 0.01 (-0.02 - 0.04)       | 812    | 12.2% | -0.01 (-0.04 - 0.02)      | 0.394               |
| WSHN                                             | 799  | 12.4% | -0.02 (-0.05 - 0.01)      | 847    | 13.1% | 0.00 (-0.03 - 0.04)       | 0.290               |
| <b>Fever and ARI</b>                             |      |       |                           |        |       |                           |                     |
| Control                                          | 2252 | 24.2% |                           | 2484   | 25.5% |                           |                     |
| Water                                            | 724  | 28.0% | 0.04 (0.00 - 0.08)        | 811    | 26.3% | 0.01 (-0.03 - 0.04)       | 0.261               |
| Sanitation                                       | 751  | 23.3% | -0.01 (-0.05 - 0.03)      | 783    | 25.5% | 0.00 (-0.04 - 0.03)       | 0.794               |
| Handwashing                                      | 736  | 25.8% | 0.01 (-0.03 - 0.06)       | 755    | 21.7% | -0.03 (-0.07 - 0.00)      | 0.093               |
| Nutrition                                        | 760  | 21.6% | -0.04 (-0.08 - 0.00)      | 703    | 23.0% | -0.02 (-0.07 - 0.02)      | 0.646               |
| WSH                                              | 742  | 24.9% | 0.01 (-0.03 - 0.05)       | 812    | 24.1% | -0.02 (-0.05 - 0.01)      | 0.160               |
| WSHN                                             | 799  | 25.5% | 0.01 (-0.03 - 0.04)       | 846    | 24.9% | -0.01 (-0.04 - 0.02)      | 0.485               |
| <b>Visibly runny nose</b>                        |      |       |                           |        |       |                           |                     |
| Control                                          | 2110 | 6.7%  |                           | 2312   | 6.7%  |                           |                     |
| Water                                            | 663  | 5.4%  | -0.01 (-0.04 - 0.01)      | 744    | 7.8%  | 0.02 (0.00 - 0.04)        | 0.025               |
| Sanitation                                       | 685  | 6.4%  | 0.00 (-0.02 - 0.03)       | 731    | 6.0%  | 0.00 (-0.03 - 0.02)       | 0.632               |
| Handwashing                                      | 679  | 6.2%  | -0.01 (-0.03 - 0.01)      | 718    | 7.1%  | 0.00 (-0.03 - 0.02)       | 0.752               |
| Nutrition                                        | 712  | 7.0%  | 0.01 (-0.01 - 0.03)       | 634    | 6.9%  | 0.00 (-0.02 - 0.02)       | 0.633               |
| WSH                                              | 672  | 5.2%  | -0.01 (-0.03 - 0.01)      | 748    | 7.8%  | 0.02 (-0.01 - 0.04)       | 0.028               |
| WSHN                                             | 719  | 5.3%  | -0.01 (-0.04 - 0.01)      | 781    | 6.4%  | 0.00 (-0.03 - 0.02)       | 0.349               |

\*An ARI was defined as caregiver-reported cough or difficulty breathing, including panting and wheezing, within the past seven days prior to the interview

**Table S11: Respiratory outcome prevalence differences by malaria seasonality, interventions vs. control**

| Subgroup                                         | Malaria Season |       |                           | Not Malaria Season |       |                           | Interaction P-value |
|--------------------------------------------------|----------------|-------|---------------------------|--------------------|-------|---------------------------|---------------------|
|                                                  | N              | Prev. | Prev. Difference (95% CI) | N                  | Prev. | Prev. Difference (95% CI) |                     |
| <b>Acute respiratory infection (ARI)*</b>        |                |       |                           |                    |       |                           |                     |
| Control                                          | 1693           | 49.3% |                           | 3076               | 44.2% |                           |                     |
| Water                                            | 521            | 51.2% | 0.02 (-0.04 - 0.07)       | 1024               | 46.7% | 0.01 (-0.03 - 0.06)       | 0.922               |
| Sanitation                                       | 501            | 46.9% | -0.03 (-0.09 - 0.03)      | 1045               | 42.5% | -0.01 (-0.05 - 0.03)      | 0.677               |
| Handwashing                                      | 525            | 45.0% | -0.04 (-0.09 - 0.01)      | 971                | 43.2% | -0.01 (-0.05 - 0.04)      | 0.362               |
| Nutrition                                        | 553            | 44.3% | -0.06 (-0.12 - 0.00)      | 919                | 41.6% | -0.03 (-0.07 - 0.02)      | 0.382               |
| WSH                                              | 634            | 42.4% | -0.07 (-0.12 - -0.02)     | 929                | 46.6% | 0.02 (-0.02 - 0.06)       | 0.006               |
| WSHN                                             | 615            | 45.9% | -0.04 (-0.09 - 0.02)      | 1042               | 44.6% | 0.00 (-0.04 - 0.04)       | 0.298               |
| <b>Panting, wheezing or difficulty breathing</b> |                |       |                           |                    |       |                           |                     |
| Control                                          | 1691           | 14.7% |                           | 3074               | 12.5% |                           |                     |
| Water                                            | 520            | 15.6% | 0.01 (-0.04 - 0.06)       | 1024               | 13.2% | 0.00 (-0.03 - 0.03)       | 0.754               |
| Sanitation                                       | 500            | 12.8% | -0.02 (-0.04 - 0.01)      | 1045               | 10.1% | -0.02 (-0.05 - 0.01)      | 0.835               |
| Handwashing                                      | 525            | 14.9% | 0.00 (-0.03 - 0.03)       | 971                | 12.0% | -0.01 (-0.03 - 0.02)      | 0.791               |
| Nutrition                                        | 552            | 12.3% | -0.03 (-0.06 - 0.01)      | 918                | 12.0% | 0.00 (-0.04 - 0.03)       | 0.271               |
| WSH                                              | 634            | 11.5% | -0.03 (-0.07 - 0.00)      | 929                | 14.3% | 0.02 (0.00 - 0.05)        | 0.012               |
| WSHN                                             | 615            | 14.6% | 0.00 (-0.04 - 0.04)       | 1042               | 11.5% | -0.01 (-0.04 - 0.02)      | 0.655               |
| <b>Fever and ARI</b>                             |                |       |                           |                    |       |                           |                     |
| Control                                          | 1693           | 26.5% |                           | 3071               | 23.8% |                           |                     |
| Water                                            | 521            | 29.9% | 0.04 (-0.01 - 0.09)       | 1023               | 25.5% | 0.01 (-0.02 - 0.04)       | 0.226               |
| Sanitation                                       | 501            | 25.0% | -0.02 (-0.06 - 0.03)      | 1045               | 23.9% | 0.00 (-0.03 - 0.04)       | 0.552               |
| Handwashing                                      | 525            | 24.6% | -0.02 (-0.07 - 0.03)      | 971                | 23.2% | 0.00 (-0.04 - 0.03)       | 0.551               |
| Nutrition                                        | 553            | 23.7% | -0.04 (-0.10 - 0.01)      | 917                | 21.3% | -0.02 (-0.06 - 0.01)      | 0.556               |
| WSH                                              | 634            | 23.2% | -0.03 (-0.07 - 0.01)      | 929                | 25.2% | 0.01 (-0.02 - 0.04)       | 0.071               |
| WSHN                                             | 615            | 25.7% | -0.02 (-0.07 - 0.03)      | 1041               | 24.8% | 0.00 (-0.03 - 0.04)       | 0.473               |
| <b>Visibly runny nose</b>                        |                |       |                           |                    |       |                           |                     |
| Control                                          | 1444           | 6.0%  |                           | 2978               | 7.1%  |                           |                     |
| Water                                            | 437            | 7.6%  | 0.02 (-0.01 - 0.05)       | 970                | 6.3%  | -0.01 (-0.03 - 0.02)      | 0.169               |
| Sanitation                                       | 424            | 9.4%  | 0.04 (0.00 - 0.08)        | 992                | 4.8%  | -0.02 (-0.04 - 0.00)      | 0.012               |
| Handwashing                                      | 465            | 7.1%  | 0.00 (-0.02 - 0.03)       | 932                | 6.4%  | -0.01 (-0.03 - 0.01)      | 0.355               |
| Nutrition                                        | 455            | 8.6%  | 0.03 (-0.01 - 0.07)       | 891                | 6.2%  | -0.01 (-0.03 - 0.01)      | 0.104               |
| WSH                                              | 541            | 7.0%  | 0.02 (-0.02 - 0.05)       | 880                | 6.3%  | 0.00 (-0.02 - 0.02)       | 0.324               |
| WSHN                                             | 508            | 6.1%  | 0.01 (-0.03 - 0.04)       | 992                | 5.7%  | -0.01 (-0.04 - 0.01)      | 0.325               |

\*An ARI was defined as caregiver-reported cough or difficulty breathing, including panting and wheezing, within the past seven days prior to the interview



**Table S12: Prevalence of breastfeeding indicators**

| <b>Outcome, Arm</b>                                 | <b>N</b> | <b>Prev.</b> |
|-----------------------------------------------------|----------|--------------|
| <b>Any breastfeeding in past 24 hours, year one</b> |          |              |
| Control                                             | 1184     | 78.0%        |
| Water                                               | 535      | 80.8%        |
| Sanitation                                          | 540      | 76.7%        |
| Handwashing                                         | 542      | 81.2%        |
| Nutrition                                           | 531      | 76.8%        |
| WSH                                                 | 582      | 81.3%        |
| WSHN                                                | 559      | 78.4%        |
| <b>Any breastfeeding in past 24 hours, year two</b> |          |              |
| Control                                             | 1541     | 28.8%        |
| Water                                               | 703      | 31.0%        |
| Sanitation                                          | 730      | 27.8%        |
| Handwashing                                         | 698      | 31.2%        |
| Nutrition                                           | 669      | 31.5%        |
| WSH                                                 | 693      | 29.7%        |
| WSHN                                                | 747      | 31.9%        |
| <b>Early initiation of breastfeeding</b>            |          |              |
| Control                                             | 1499     | 52.3%        |
| Water                                               | 693      | 51.5%        |
| Sanitation                                          | 692      | 53.6%        |
| Handwashing                                         | 695      | 48.2%        |
| Nutrition                                           | 678      | 78.3%        |
| WSH                                                 | 729      | 50.2%        |
| WSHN                                                | 744      | 76.5%        |
| <b>Exclusive breastfeeding for 6 months</b>         |          |              |
| Control                                             | 1495     | 32.4%        |
| Water                                               | 691      | 38.8%        |
| Sanitation                                          | 688      | 39.7%        |
| Handwashing                                         | 694      | 36.3%        |
| Nutrition                                           | 676      | 56.1%        |
| WSH                                                 | 727      | 30.8%        |
| WSHN                                                | 742      | 50.5%        |

**Table S13: Prevalence of breastfeeding indicators, stratified by child sex**

| <b>Outcome</b>                               | <b>Male</b> |              | <b>Female</b> |              |
|----------------------------------------------|-------------|--------------|---------------|--------------|
|                                              | <b>N</b>    | <b>Prev.</b> | <b>N</b>      | <b>Prev.</b> |
| Any breastfeeding in past 24 hours, year one | 2097        | 81.8%        | 2196          | 82.6%        |
| Any breastfeeding in past 24 hours, year two | 2604        | 32.7%        | 2720          | 32.5%        |
| Early initiation of breastfeeding            | 2803        | 56.9%        | 2927          | 58.7%        |
| Exclusive breastfeeding for 6 months         | 2793        | 39.7%        | 2920          | 39.3%        |

**Table S14: Unadjusted effects of interventions on prevalence of reported runny nose, intervention vs. control**

| <b>Arm</b>  | <b>N</b> | <b>Prev.</b> | <b>Prev. Ratio<br/>(95% CI)</b> | <b>P-value</b> | <b>Prev. Difference<br/>(95% CI)</b> | <b>P-value</b> |
|-------------|----------|--------------|---------------------------------|----------------|--------------------------------------|----------------|
| Control     | 4769     | 60.5%        |                                 |                |                                      |                |
| Water       | 1545     | 59.9%        | 0.99 (0.94 - 1.04)              | 0.611          | -0.01 (-0.04 - 0.02)                 | 0.610          |
| Sanitation  | 1546     | 61.9%        | 1.04 (0.98 - 1.09)              | 0.133          | 0.02 (-0.01 - 0.05)                  | 0.138          |
| Handwashing | 1497     | 58.3%        | 0.98 (0.93 - 1.03)              | 0.335          | -0.01 (-0.04 - 0.01)                 | 0.330          |
| Nutrition   | 1472     | 57.1%        | 0.94 (0.88 - 1.00)              | 0.045          | -0.04 (-0.07 - 0.00)                 | 0.041          |
| WSH         | 1563     | 59.4%        | 0.98 (0.93 - 1.04)              | 0.576          | -0.01 (-0.04 - 0.02)                 | 0.574          |
| WSHN        | 1658     | 59.3%        | 0.98 (0.93 - 1.02)              | 0.334          | -0.01 (-0.04 - 0.01)                 | 0.332          |

**Table S15: Reported runny nose prevalence ratios and differences by malaria seasonality interventions vs. control**

| <b>Subgroup</b> | <b>Malaria Season</b> |              |                                 |                                      | <b>Not Malaria Season</b> |              |                                 |                                      | <b>Interaction<br/>P-value</b> |
|-----------------|-----------------------|--------------|---------------------------------|--------------------------------------|---------------------------|--------------|---------------------------------|--------------------------------------|--------------------------------|
|                 | <b>N</b>              | <b>Prev.</b> | <b>Prev. Ratio<br/>(95% CI)</b> | <b>Prev. Difference<br/>(95% CI)</b> | <b>N</b>                  | <b>Prev.</b> | <b>Prev. Ratio<br/>(95% CI)</b> | <b>Prev. Difference<br/>(95% CI)</b> |                                |
| Control         | 1693                  | 64.3%        |                                 |                                      | 3076                      | 58.4%        |                                 |                                      |                                |
| Water           | 521                   | 61.4%        | 0.96 (0.90 - 1.02)              | -0.03 (-0.07 - 0.01)                 | 1024                      | 59.2%        | 1.00 (0.94 - 1.07)              | 0.00 (-0.04 - 0.04)                  | 0.313                          |
| Sanitation      | 501                   | 65.3%        | 1.02 (0.93 - 1.12)              | 0.01 (-0.05 - 0.08)                  | 1045                      | 60.3%        | 1.05 (0.99 - 1.11)              | 0.03 (0.00 - 0.06)                   | 0.654                          |
| Handwashing     | 526                   | 57.4%        | 0.91 (0.83 - 0.99)              | -0.06 (-0.11 - -0.01)                | 971                       | 58.8%        | 1.02 (0.95 - 1.09)              | 0.01 (-0.03 - 0.05)                  | 0.062                          |
| Nutrition       | 553                   | 58.8%        | 0.92 (0.84 - 1.00)              | -0.05 (-0.11 - 0.00)                 | 919                       | 56.0%        | 0.95 (0.88 - 1.03)              | -0.03 (-0.07 - 0.02)                 | 0.520                          |
| WSH             | 634                   | 59.3%        | 0.93 (0.86 - 1.01)              | -0.04 (-0.09 - 0.01)                 | 929                       | 59.4%        | 1.02 (0.95 - 1.10)              | 0.01 (-0.03 - 0.05)                  | 0.112                          |
| WSHN            | 615                   | 62.1%        | 0.96 (0.89 - 1.04)              | -0.02 (-0.07 - 0.03)                 | 1043                      | 57.6%        | 0.98 (0.92 - 1.05)              | -0.01 (-0.05 - 0.03)                 | 0.718                          |

Interaction P-value corresponds to prevalence ratio.

**Figure S1: Acute respiratory infections by calendar month**

Individual children were measured once at each round of follow-up, but due to the large study size each follow-up measurement spanned approximately one calendar year. Control and intervention clusters were geographically matched, and matched clusters were measured concurrently. All intervention arms had similar prevalence during follow-up (Figure 2) and were combined into a single data series in this figure to have sufficient observations to estimate monthly prevalence. The control data series has a median of 213 observations per month (first quartile (Q1): 193, third quartile (Q3): 267) and the intervention data series has a median of 418 observations per month (Q1: 337, Q3: 507).

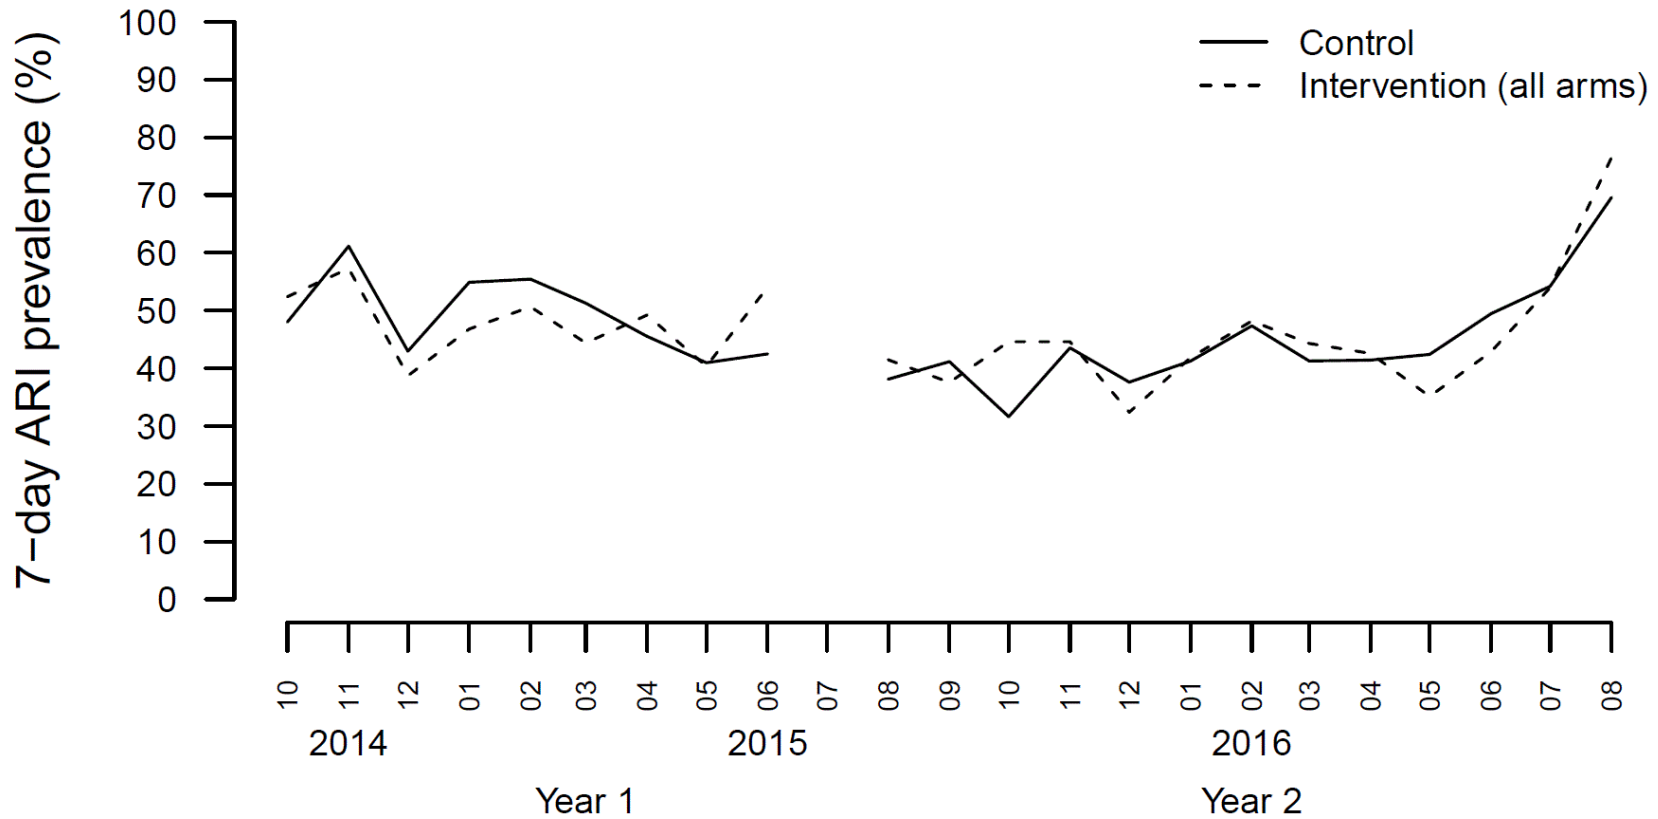

Supplement: tpmd190779.SD1.pdf [file tpmd190779.SD1.pdf]
